# Supplementary material for: A multiplex platform for the identification of ovarian cancer biomarkers
Source: PubMed Central journal article supplement (PMC5634875; doi:10.1186/s12014-017-9169-6), 2017-10-10
Supplement: 12014_2017_9169_MOESM3_ESM.pdf [file 12014_2017_9169_MOESM3_ESM.pdf]

Additional file 3.

| Protein        | AUC (95% CI)      | Rank | Sensitivity at 95% Specificity (95% CI) | Rank |
|----------------|-------------------|------|-----------------------------------------|------|
| HE4            | 1 (0.98, 1)       | 1    | 0.99 (0.91, 1)                          | 2    |
| CA.125         | 1 (0.97, 1)       | 2    | 1 (0.89, 1)                             | 1    |
| KLK6           | 0.95 (0.91, 0.99) | 3    | 0.88 (0.74, 0.97)                       | 3    |
| MK             | 0.95 (0.9, 0.99)  | 4    | 0.79 (0.61, 0.96)                       | 4    |
| hK11           | 0.93 (0.87, 0.97) | 5    | 0.7 (0.48, 0.91)                        | 6    |
| FR.alpha       | 0.91 (0.83, 0.98) | 6    | 0.75 (0.55, 0.93)                       | 5    |
| IL.6           | 0.91 (0.82, 0.97) | 7    | 0.69 (0.44, 0.88)                       | 7    |
| CSF.1          | 0.87 (0.75, 0.96) | 8    | 0.4 (0.12, 0.8)                         | 20   |
| CXCL13         | 0.86 (0.77, 0.95) | 9    | 0.6 (0.32, 0.82)                        | 9    |
| EZR            | 0.86 (0.76, 0.93) | 10   | 0.63 (0.42, 0.83)                       | 8    |
| PRSS8          | 0.86 (0.74, 0.94) | 11   | 0.56 (0.32, 0.81)                       | 12   |
| FUR            | 0.84 (0.74, 0.94) | 12   | 0.48 (0.27, 0.76)                       | 15   |
| AM             | 0.83 (0.71, 0.94) | 13   | 0.46 (0.22, 0.77)                       | 17   |
| CXCL10         | 0.83 (0.73, 0.92) | 14   | 0.57 (0.32, 0.8)                        | 10   |
| TNF.R1         | 0.8 (0.67, 0.93)  | 15   | 0.36 (0.09, 0.75)                       | 23   |
| CSTB           | 0.79 (0.64, 0.92) | 16   | 0.36 (0.11, 0.76)                       | 22   |
| ILT.3          | 0.79 (0.65, 0.91) | 17   | 0.32 (0.09, 0.7)                        | 26   |
| CXCL9          | 0.78 (0.65, 0.9)  | 18   | 0.48 (0.21, 0.74)                       | 16   |
| VEGF.A         | 0.77 (0.65, 0.88) | 19   | 0.52 (0.26, 0.71)                       | 14   |
| IL.7           | 0.76 (0.62, 0.89) | 20   | 0.38 (0.14, 0.64)                       | 21   |
| ITGA1          | 0.76 (0.62, 0.88) | 21   | 0.57 (0.38, 0.75)                       | 11   |
| ErbB4.HER4     | 0.75 (0.62, 0.86) | 22   | 0.53 (0.32, 0.7)                        | 13   |
| IL.8           | 0.74 (0.56, 0.9)  | 23   | 0.2 (0.01, 0.66)                        | 50   |
| MCP.1          | 0.74 (0.59, 0.89) | 24   | 0.22 (0.06, 0.57)                       | 43   |
| U.PAR          | 0.74 (0.57, 0.85) | 25   | 0.15 (0.03, 0.41)                       | 58   |
| LYN            | 0.73 (0.58, 0.89) | 26   | 0.3 (0.1, 0.57)                         | 29   |
| TNF.R2         | 0.73 (0.57, 0.87) | 27   | 0.28 (0.06, 0.62)                       | 33   |
| CDH3           | 0.73 (0.57, 0.86) | 28   | 0.36 (0.17, 0.6)                        | 24   |
| NTRK3          | 0.72 (0.58, 0.84) | 29   | 0.42 (0.2, 0.64)                        | 18   |
| TRAIL.R2       | 0.72 (0.57, 0.87) | 30   | 0.21 (0.02, 0.62)                       | 45   |
| Ep.CAM         | 0.71 (0.54, 0.87) | 31   | 0.14 (0.01, 0.5)                        | 59   |
| FS             | 0.71 (0.55, 0.91) | 32   | 0.17 (0.01, 0.64)                       | 52   |
| PARK7          | 0.71 (0.56, 0.84) | 33   | 0.28 (0.1, 0.56)                        | 32   |
| SCF            | 0.7 (0.52, 0.88)  | 34   | 0.25 (0.01, 0.71)                       | 39   |
| FADD           | 0.7 (0.54, 0.82)  | 35   | 0.35 (0.14, 0.56)                       | 25   |
| CXCL11         | 0.69 (0.54, 0.87) | 36   | 0.14 (0, 0.66)                          | 60   |
| EGFR           | 0.69 (0.53, 0.82) | 37   | 0.28 (0.09, 0.53)                       | 35   |
| PDGF.subunit.B | 0.69 (0.53, 0.85) | 38   | 0.15 (0.03, 0.46)                       | 56   |
| VIM            | 0.69 (0.53, 0.82) | 39   | 0.05 (0.01, 0.23)                       | 84   |
| ICOSLG         | 0.69 (0.55, 0.85) | 40   | 0.41 (0.22, 0.62)                       | 19   |
| TNFSF14        | 0.69 (0.53, 0.86) | 41   | 0.27 (0.12, 0.5)                        | 37   |
| MMP.1          | 0.69 (0.55, 0.84) | 42   | 0.2 (0.06, 0.42)                        | 47   |
| TNFRSF4        | 0.68 (0.53, 0.82) | 43   | 0.29 (0.04, 0.57)                       | 30   |
| GDF.15         | 0.68 (0.51, 0.88) | 44   | 0.05 (0, 0.56)                          | 85   |
| BAFF           | 0.68 (0.5, 0.91)  | 45   | 0.11 (0, 0.67)                          | 67   |

|                |                   |    |                   |    |
|----------------|-------------------|----|-------------------|----|
| HGF            | 0.67 (0.51, 0.84) | 46 | 0.2 (0.02, 0.63)  | 48 |
| IL.1ra         | 0.66 (0.5, 0.84)  | 47 | 0.17 (0.03, 0.45) | 53 |
| FAS            | 0.66 (0.49, 0.81) | 48 | 0.32 (0.05, 0.63) | 27 |
| FasL           | 0.66 (0.51, 0.81) | 49 | 0.12 (0.01, 0.37) | 63 |
| HB.EGF         | 0.66 (0.5, 0.83)  | 50 | 0.16 (0.03, 0.46) | 54 |
| IL.6RA         | 0.65 (0.47, 0.8)  | 51 | 0.24 (0.07, 0.53) | 41 |
| CD69           | 0.65 (0.47, 0.8)  | 52 | 0.23 (0.06, 0.45) | 42 |
| Flt3L          | 0.65 (0.47, 0.81) | 53 | 0.11 (0.02, 0.34) | 70 |
| EMMPRIN        | 0.64 (0.47, 0.79) | 54 | 0.29 (0.1, 0.49)  | 31 |
| MIC.A          | 0.64 (0.49, 0.82) | 55 | 0.1 (0, 0.33)     | 71 |
| PIGF           | 0.64 (0.47, 0.81) | 56 | 0.13 (0, 0.54)    | 62 |
| CD40.L         | 0.64 (0.45, 0.85) | 57 | 0.28 (0.14, 0.53) | 34 |
| LITAF          | 0.64 (0.48, 0.79) | 58 | 0.13 (0.02, 0.38) | 61 |
| CASP.3         | 0.64 (0.48, 0.77) | 59 | 0.26 (0.07, 0.48) | 38 |
| VEGFR.2        | 0.64 (0.49, 0.82) | 60 | 0.08 (0.01, 0.41) | 79 |
| PTPN22         | 0.63 (0.46, 0.79) | 61 | 0.09 (0.01, 0.28) | 77 |
| ErbB3.HER3     | 0.62 (0.45, 0.77) | 62 | 0.31 (0.1, 0.56)  | 28 |
| VEGF.D         | 0.62 (0.44, 0.79) | 63 | 0.09 (0, 0.33)    | 76 |
| CCL19          | 0.62 (0.45, 0.8)  | 64 | 0.11 (0.01, 0.56) | 69 |
| CDKN1A         | 0.62 (0.45, 0.79) | 65 | 0.15 (0.02, 0.45) | 57 |
| TR.AP          | 0.62 (0.44, 0.8)  | 66 | 0.09 (0, 0.38)    | 74 |
| PECAM.1        | 0.61 (0.44, 0.78) | 67 | 0.12 (0.02, 0.31) | 66 |
| CXCL5          | 0.61 (0.43, 0.75) | 68 | 0.02 (0, 0.14)    | 88 |
| MIA            | 0.61 (0.46, 0.8)  | 69 | 0.25 (0.08, 0.48) | 40 |
| IL.12          | 0.61 (0.44, 0.77) | 70 | 0.28 (0.11, 0.51) | 36 |
| TGF.alpha      | 0.6 (0.44, 0.78)  | 71 | 0.09 (0.01, 0.41) | 75 |
| IL.17RB        | 0.6 (0.44, 0.77)  | 72 | 0.16 (0.04, 0.42) | 55 |
| TNF            | 0.6 (0.41, 0.69)  | 73 | 0 (0, 0.09)       | 92 |
| GH             | 0.6 (0.42, 0.79)  | 74 | 0.03 (0, 0.34)    | 87 |
| REG.4          | 0.59 (0.42, 0.79) | 75 | 0.07 (0, 0.31)    | 81 |
| VE.statin      | 0.59 (0.42, 0.73) | 76 | 0.02 (0, 0.19)    | 89 |
| AR             | 0.59 (0.41, 0.73) | 77 | 0.2 (0, 0.47)     | 49 |
| CAIX           | 0.59 (0.42, 0.76) | 78 | 0.1 (0, 0.52)     | 72 |
| IL.2           | 0.59 (0.34, 0.68) | 79 | 0 (0, 0.11)       | 91 |
| NEMO           | 0.58 (0.41, 0.73) | 80 | 0.06 (0.01, 0.2)  | 82 |
| MYD88          | 0.57 (0.4, 0.75)  | 81 | 0.06 (0, 0.35)    | 83 |
| SELE           | 0.57 (0.39, 0.77) | 82 | 0.09 (0.01, 0.33) | 73 |
| IFN.gamma      | 0.57 (0.42, 0.75) | 83 | 0.04 (0, 0.35)    | 86 |
| eIF.4B         | 0.56 (0.38, 0.72) | 84 | 0.11 (0.02, 0.29) | 68 |
| EPO            | 0.55 (0.36, 0.72) | 85 | 0.01 (0, 0.07)    | 90 |
| LAP.TGF.beta.1 | 0.55 (0.39, 0.74) | 86 | 0.08 (0.01, 0.3)  | 80 |
| TF             | 0.55 (0.37, 0.72) | 87 | 0.21 (0.04, 0.44) | 46 |
| CEA            | 0.55 (0.38, 0.74) | 88 | 0.12 (0.03, 0.27) | 64 |
| TIE2           | 0.55 (0.37, 0.7)  | 89 | 0.18 (0.06, 0.34) | 51 |
| THPO           | 0.54 (0.39, 0.73) | 90 | 0.08 (0.01, 0.28) | 78 |
| ErbB2.HER2     | 0.52 (0.34, 0.69) | 91 | 0.22 (0.03, 0.5)  | 44 |
| PRL            | 0.51 (0.34, 0.66) | 92 | 0.12 (0.02, 0.35) | 65 |
